# Supplementary material
Source: publisher figshare collection journal article supplement (https://karger.figshare.com/articles/dataset/_/5128432)
Supplement: Supplementary file 1 [file 1]

Supplementary Figure 2: Individual serum CRP levels during the ASTIC trial
